# Supplementary material for: Subjective perceptions of workload and stress of emergency service personnel depending on work-related behavior and experience patterns
Source: Springer Nature journal article supplement (doi:10.1007/s10049-022-01076-y), 2022-09-08
Supplement: MOESM1 [file 23467670]

**Supplementary material** to the article "**Subjective perceptions of workload and stress of emergency service personnel depending on work-related behavior and experience patterns**" by Beatrice Thielmann, Heiko Schumann, Julia Botscharow and Irina Böckelmann (2022) in *Notfall+Rettungsmedizin*.  
Article and supplementary material are available at [www.springermedizin.de](http://www.springermedizin.de). Please enter the article title in the search there.

## Expression of AVEM dimensions in respondents with different AVEM pattern.

| Feature                                               | AVEM sample                                 |                                          |                                          |                                          |
|-------------------------------------------------------|---------------------------------------------|------------------------------------------|------------------------------------------|------------------------------------------|
|                                                       | A<br>(n = 40)                               | B<br>(n = 27)                            | G<br>(n = 63)                            | S<br>(n = 75)                            |
|                                                       | AV ± SD<br>Median (Min - Max)<br>[95% - CI] |                                          |                                          |                                          |
| <b>Subjective importance of work</b>                  | 6,1 ± 1,54<br>6 (2 - 9)<br>[5,56 - 6,54]    | 4,0 ± 1,18<br>4 (1 - 5)<br>[3,53 - 4,47] | 5,0 ± 1,63<br>5 (2 - 9)<br>[4,56 - 5,38] | 3,4 ± 1,39<br>3 (1 - 7)<br>[3,11 - 3,75] |
| <b>Work-related ambition</b>                          | 6,7 ± 1,60<br>7 (3 - 9)<br>[6,19 - 7,21]    | 4,5 ± 1,28<br>5 (2 - 7)<br>[4,01 - 5,03] | 6,8 ± 1,31<br>7 (4 - 9)<br>[6,49 - 7,16] | 4,0 ± 1,27<br>4 (1 - 6)<br>[3,69 - 4,28] |
| <b>Willingness to work until exhausted</b>            | 6,9 ± 1,37<br>6 (4 - 9)<br>[6,41 - 7,29]    | 5,2 ± 1,31<br>5 (3 - 9)<br>[4,70 - 5,74] | 5,3 ± 1,49<br>5 (1 - 9)<br>[4,88 - 5,63] | 3,8 ± 1,35<br>4 (1 - 6)<br>[3,49 - 4,11] |
| <b>Striving for perfection</b>                        | 5,8 ± 1,42<br>6 (2 - 9)<br>[5,32 - 6,23]    | 4,2 ± 1,41<br>4 (2 - 7)<br>[3,59 - 4,70] | 2,8 ± 1,33<br>6 (3 - 9)<br>[5,41 - 6,08] | 3,8 ± 1,11<br>4 (1 - 6)<br>[3,50 - 4,02] |
| <b>Distancing ability</b>                             | 4,3 ± 1,31<br>4 (1 - 7)<br>[3,91 - 4,74]    | 5,3 ± 1,16<br>5 (3 - 7)<br>[4,80 - 5,72] | 6,9 ± 1,12<br>7 (4 - 9)<br>[6,61 - 7,17] | 7,4 ± 0,79<br>7 (6 - 9)<br>[7,19 - 7,55] |
| <b>Tendency to resignation in the face of failure</b> | 5,6 ± 1,28<br>6 (3 - 8)<br>[5,19 - 6,01]    | 5,6 ± 1,31<br>6 (2 - 8)<br>[5,11 - 6,15] | 3,6 ± 1,63<br>4 (1 - 8)<br>[3,18 - 4,00] | 3,2 ± 1,28<br>3 (1 - 6)<br>[2,94 - 3,54] |
| <b>Proactive problem-solving</b>                      | 4,9 ± 1,74<br>5 (1 - 8)<br>[4,34 - 5,46]    | 3,3 ± 1,40<br>3 (1 - 6)<br>[2,70 - 3,81] | 6,1 ± 1,53<br>6 (2 - 9)<br>[5,71 - 6,48] | 3,6 ± 1,47<br>3 (1 - 8)<br>[3,29 - 3,96] |
| <b>Inner calm and balance</b>                         | 4,6 ± 1,08<br>4,5(2 - 7)<br>[4,23 - 4,92]   | 4,0 ± 1,11<br>4 (2 - 6)<br>[3,56 - 4,44] | 6,7 ± 1,36<br>7 (4 - 9)<br>[6,36 - 7,04] | 5,7 ± 1,49<br>6 (2 - 9)<br>[5,36 - 6,05] |
| <b>Experience of success at work</b>                  | 3,4 ± 1,26<br>3 (1 - 7)<br>[3,00 - 3,80]    | 2,0 ± 1,00<br>2 (1 - 4)<br>[1,60 - 2,40] | 4,9 ± 1,49<br>5 (1 - 8)<br>[4,48 - 5,23] | 4,1 ± 1,53<br>4 (1 - 8)<br>[3,73 - 4,43] |
| <b>Satisfaction with life</b>                         | 3,1 ± 1,44<br>3 (1 - 6)<br>[2,67 - 3,58]    | 1,9 ± 1,00<br>2 (1 - 5)<br>[1,53 - 2,32] | 5,3 ± 1,28<br>5 (2 - 8)<br>[5,01 - 5,66] | 4,5 ± 1,17<br>4 (1 - 7)<br>[4,22 - 4,76] |
| <b>Experience of social support</b>                   | 3,4 ± 1,22<br>3 (1 - 6)<br>[3,01 - 3,79]    | 3,2 ± 1,25<br>3 (1 - 6)<br>[2,73 - 3,72] | 5,9 ± 1,46<br>6 (3 - 8)<br>[5,52 - 6,26] | 5,0 ± 1,56<br>5 (2 - 8)<br>[4,60 - 5,32] |

*Notes.* Since the classification of the AVEM patterns is based on the expression of the dimensions, a significance of  $p < 0.001$  has been calculated in the Kruskal-Wallis test in each dimension. CI=confidence interval, AV ± SD= average value and standard deviation
