# Supplementary material for: Subjective perceptions of workload and stress of emergency service personnel depending on work-related behavior and experience patterns
Source: Springer Nature journal article supplement (doi:10.1007/s10049-022-01076-y), 2022-09-08
Supplement: MOESM3 [file 23467670]

**Supplementary material** to the article "**Subjective perceptions of workload and stress of emergency service personnel depending on work-related behavior and experience patterns**" by Beatrice Thielmann, Heiko Schumann, Julia Botscharow and Irina Böckelmann (2022) in *Notfall+Rettingmsmedizin*.  
Article and supplementary material are available at [www.springermedizin.de](http://www.springermedizin.de). Please enter the article title in the search there

### 3: Physical, psychological and social-communicative impairments within the AVEM groups.

| KOEPS dimensions                                                                            | AVEM sample                                 |                                        |                                        |                                        | PKruskal -<br>Valais | PMann -Whitney                       |
|---------------------------------------------------------------------------------------------|---------------------------------------------|----------------------------------------|----------------------------------------|----------------------------------------|----------------------|--------------------------------------|
|                                                                                             | A                                           | B                                      | G                                      | S                                      |                      |                                      |
|                                                                                             | AV ± SD<br>Median (Min - Max)<br>[95% - AI] |                                        |                                        |                                        |                      |                                      |
| <b>KOEPS</b>                                                                                |                                             |                                        |                                        |                                        |                      |                                      |
| <b>Physical impairment</b>                                                                  | 5,6 ± 1,43<br>5,5 (3 - 9)<br>[5,2 - 6,1]    | 5,6 ± 1,45<br>6 (3 - 8)<br>[5,1 - 6,2] | 4,2 ± 1,59<br>4 (2 - 9)<br>[3,8 - 4,6] | 4,1 ± 1,55<br>4 (2 - 8)<br>[3,7 - 4,4] | <b>&lt;0,001</b>     | A-G***<br>A-S***<br>B-G***<br>B-S*** |
| <b>Mental impairment</b>                                                                    | 5,6 ± 1,32<br>5 (4 - 8)<br>[5,1 - 6,0]      | 6,0 ± 1,72<br>6 (3 - 9)<br>[5,4 - 6,7] | 4,1 ± 1,55<br>4 (2 - 9)<br>[3,7 - 4,4] | 3,8 ± 1,43<br>4 (1 - 8)<br>[3,5 - 4,2] | <b>&lt;0,001</b>     | A-G***<br>A-S***<br>B-G***<br>B-S*** |
| <b>Social-communicative<br/>Impairment</b>                                                  | 5,0 ± 1,25<br>5 (3 - 8)<br>[4,6 - 5,4]      | 5,6 ± 1,62<br>5 (3 - 9)<br>[5,0 - 6,2] | 3,8 ± 1,12<br>3 (3 - 8)<br>[3,5 - 4,1] | 3,8 ± 1,10<br>3 (3 - 8)<br>[3,6 - 4,1] | <b>&lt;0,001</b>     | A-G***<br>A-S***<br>B-G***<br>B-S*** |
| <b>Total</b>                                                                                | 5,4 ± 1,36<br>5 (4 - 9)<br>[5,0 - 5,9]      | 5,9 ± 1,76<br>6 (3 - 9)<br>[5,2 - 6,6] | 3,7 ± 1,65<br>4 (1 - 9)<br>[3,3 - 4,1] | 3,5 ± 1,50<br>4 (1 - 8)<br>[3,3 - 4,1] | <b>&lt;0,001</b>     | A-G***<br>A-S***<br>B-G***<br>B-S*** |
| Notes. *** p<0.001. CI=confidence interval, AV ± SD= average valvue and standard deviation. |                                             |                                        |                                        |                                        |                      |                                      |
