# Supplementary material for: Subjective perceptions of workload and stress of emergency service personnel depending on work-related behavior and experience patterns
Source: Springer Nature journal article supplement (doi:10.1007/s10049-022-01076-y), 2022-09-08
Supplement: MOESM4 [file 23467670]

**Supplementary material** to the article "**Subjective perceptions of workload and stress of emergency service personnel depending on work-related behavior and experience patterns**" by Beatrice Thielmann, Heiko Schumann, Julia Botscharow and Irina Böckelmann (2022) in *Notfall+Rettungsmedizin*.  
Article

4: Correlation analysis according to Spearman of the AVEM dimensions with the main scales of the KOEPS and EBF.

|       |            | AVEM |         |           |    |           |           |          |           |           |           |           |
|-------|------------|------|---------|-----------|----|-----------|-----------|----------|-----------|-----------|-----------|-----------|
|       |            | BA   | BE      | VB        | PS | DF        | RT        | OP       | IR        | EE        | LZ        | SU        |
| KOEPS | <b>G</b>   |      | 0,180** | 0,341***  |    | -0,400*** | 0,396***  |          | -0,305*** | -0,282*** | -0,404*** | -0,223*** |
|       | <b>BEA</b> |      |         | 0,308***  |    | -0,417*** | 0,370***  | -0,147*  | -0,322*** | -0,262*** | -0,468*** | -0,251*** |
| EBF   | <b>ERH</b> |      |         | -0,251*** |    | 0,498***  | -0,333*** | 0,253*** | 0,334***  | 0,343***  | 0,532***  | 0,308***  |

Notes. \* p < 0.05; \*\* p < 0.01; \*\*\* p < 0.001.

Abbreviations for AVEM dimensions: BA: Subjective importance of work, BE: Work-related ambition, VB: Willingness to work until exhausted, PS: Striving for perfection, DF: Distancing ability, RT: Tendency to resignation in the face of failure, OP: Proactive problem-solving, IR: Inner calm and balance, EE: Experience of success at work, LZ: Satisfaction with life, SU: Experience of social support. Abbreviations for KOEPS scales: G - Total impairments. Abbreviations for EBF subscales and main scales: BEA – strain. ERH – Recovery.
